# Supplementary material for: Experimental charge density in an oxidized trinuclear iron complex using 15 K synchrotron and 100 K conventional single-crystal X-ray diffraction
Source: Royal Society of Chemistry journal article supplement (doi:10.1039/b811576a), 2008-12-04
Supplement: b811576a.pdf [file b811576a.pdf]

**SUPPORTING INFORMATION FOR**

**Experimental charge density in an oxidized trinuclear iron complex using 15 K synchrotron and 100 K conventional single crystal X-ray diffraction**

by

Jacob Overgaard, Grigore A. Timco, Finn K. Larsen, Bo B. Iversen

## Residual density maps

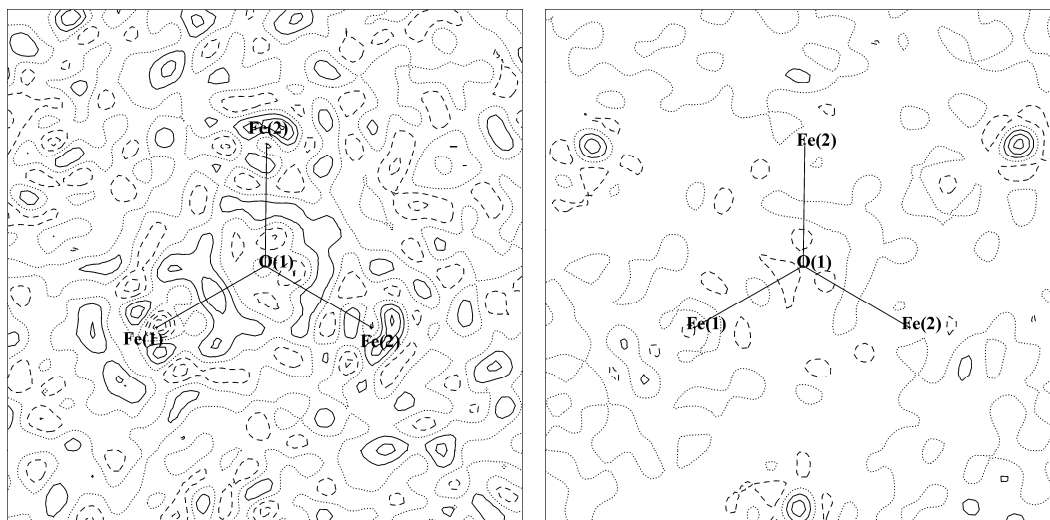

**Figure S1. Residual density maps from synchrotron (left) and conventional (right) models using a resolution of  $0.9 \text{ \AA}^{-1}$ . Contours as in Figure 2a.**

## Topological analysis

**Table S1A.** Synchrotron model. The values shown are: the density at the bcp,  $\rho_b(r)$  in  $e \text{ \AA}^{-3}$ ; the Laplacian at the bcp,  $\nabla^2\rho(r)$ , in  $e \text{ \AA}^{-5}$ ; the inter-nuclear distance,  $d_{1-2}$ , in  $\text{ \AA}$ ; the distance from the first atom to the bcp,  $d_{1-bcp}$ , in  $\text{ \AA}$ ; the three eigenvalues of the Hessian matrix,  $\lambda_{1-3}$ , in  $e \text{ \AA}^{-5}$ ; the ellipticity,  $\epsilon$ .

| Bond        | $\rho_b(r)$ | $\nabla^2\rho(r)$ | $d_{1-2}$ | $d_{1-bcp}$ | $d_{2-bcp}$ | $\lambda_1$ | $\lambda_2$ | $\lambda_3$ | $\epsilon$ |
|-------------|-------------|-------------------|-----------|-------------|-------------|-------------|-------------|-------------|------------|
| FE(1)-O(1)  | 0.576(8)    | 12.88(1)          | 1.945     | 0.994       | 0.951       | -3.78       | -3.5        | 20.16       | 0.08       |
| FE(1)-O(11) | 0.469(4)    | 10.30(1)          | 2.035     | 1.021       | 1.015       | -3.02       | -2.87       | 16.19       | 0.05       |
| FE(1)-O(21) | 0.478(5)    | 10.53(1)          | 2.015     | 1.012       | 1.003       | -3.05       | -2.85       | 16.43       | 0.07       |
| FE(1)-O(1A) | 0.493(3)    | 10.95(1)          | 1.999     | 1.001       | 0.998       | -3.02       | -2.95       | 16.92       | 0.02       |
| FE(2)-O(1)  | 0.620(5)    | 14.41(1)          | 1.916     | 0.969       | 0.947       | -3.99       | -3.77       | 22.18       | 0.06       |
| FE(2)-O(12) | 0.434(4)    | 9.87(1)           | 2.036     | 1.018       | 1.019       | -2.65       | -2.48       | 15          | 0.07       |
| FE(2)-O(22) | 0.463(4)    | 10.37(1)          | 2.032     | 1.017       | 1.016       | -2.87       | -2.77       | 16.01       | 0.04       |
| FE(2)-O(31) | 0.469(4)    | 10.48(1)          | 2.022     | 1.014       | 1.008       | -2.89       | -2.76       | 16.13       | 0.05       |
| FE(2)-O(41) | 0.425(4)    | 9.93(1)           | 2.031     | 1.017       | 1.015       | -2.56       | -2.34       | 14.82       | 0.1        |
| FE(2)-O(2A) | 0.448(4)    | 10.17(1)          | 2.035     | 1.020       | 1.015       | -2.69       | -2.57       | 15.43       | 0.05       |
| O(11)-C(11) | 2.76(4)     | -24.9(2)          | 1.255     | 0.755       | 0.500       | -25.83      | -23.49      | 24.41       | 0.1        |
| O(12)-C(11) | 2.78(4)     | -26.3(2)          | 1.255     | 0.760       | 0.495       | -25.93      | -24.2       | 23.85       | 0.07       |
| O(21)-C(21) | 2.82(4)     | -31.1(2)          | 1.253     | 0.768       | 0.486       | -27.05      | -26.84      | 22.84       | 0.01       |
| O(22)-C(21) | 2.74(4)     | -27.1(2)          | 1.259     | 0.766       | 0.493       | -27.16      | -23.65      | 23.75       | 0.15       |
| O(31)-C(31) | 2.81(2)     | -26.95(8)         | 1.260     | 0.747       | 0.513       | -26.93      | -24.28      | 24.25       | 0.11       |
| O(41)-C(41) | 2.84(2)     | -33.1(1)          | 1.253     | 0.759       | 0.495       | -29.46      | -25.96      | 22.33       | 0.13       |
| O(1A)-C(1A) | 2.48(3)     | -18.4(1)          | 1.288     | 0.771       | 0.517       | -21.94      | -20.57      | 24.07       | 0.07       |
| O(1B)-C(1A) | 2.91(3)     | -26.0(1)          | 1.229     | 0.739       | 0.490       | -27.02      | -24.42      | 25.46       | 0.11       |
| O(2A)-C(2A) | 2.79(4)     | -27.7(2)          | 1.265     | 0.745       | 0.520       | -26.05      | -25.61      | 23.96       | 0.02       |
| O(2B)-C(2A) | 2.79(4)     | -26.6(2)          | 1.247     | 0.761       | 0.486       | -27.25      | -23.69      | 24.3        | 0.15       |
| N(4)-C(4A)  | 2.44(3)     | -20.1(1)          | 1.352     | 0.751       | 0.601       | -21.17      | -19.25      | 20.3        | 0.1        |
| N(4)-C(4E)  | 2.30(3)     | -18.5(1)          | 1.347     | 0.786       | 0.562       | -18.98      | -17.19      | 17.64       | 0.1        |
| C(4A)-C(4B) | 2.31(3)     | -19.18(8)         | 1.379     | 0.717       | 0.662       | -18.98      | -15.78      | 15.58       | 0.2        |
| C(4B)-C(4C) | 2.24(3)     | -18.79(9)         | 1.399     | 0.734       | 0.665       | -18.11      | -15.99      | 15.31       | 0.13       |
| C(4C)-C(4D) | 2.28(3)     | -18.03(9)         | 1.390     | 0.733       | 0.657       | -18.36      | -15.48      | 15.82       | 0.19       |
| C(4D)-C(4E) | 2.21(3)     | -16.45(8)         | 1.394     | 0.709       | 0.686       | -17.88      | -14.7       | 16.13       | 0.22       |
| C(4E)-C(4F) | 1.76(3)     | -9.51(7)          | 1.494     | 0.800       | 0.694       | -12.26      | -12.09      | 14.84       | 0.01       |

**Table S1B.** Conventional model. The values shown are: the density at the bcp,  $\rho_b(r)$  in  $e \text{ \AA}^{-3}$ ; the Laplacian at the bcp,  $\nabla^2\rho(r)$ , in  $e \text{ \AA}^{-5}$ ; the inter-nuclear distance,  $d_{1-2}$ , in  $\text{ \AA}$ ; the distance from the first atom to the bcp,  $d_{1-bcp}$ , in  $\text{ \AA}$ ; the three eigenvalues of the Hessian matrix,  $\lambda_{1-3}$ , in  $e \text{ \AA}^{-5}$ ; the ellipticity,  $\epsilon$ .

| Bond | $\rho_b(r)$ | $\nabla^2\rho(r)$ | $d_{1-2}$ | $d_{1-bcp}$ | $d_{2-bcp}$ | $\lambda_1$ | $\lambda_2$ | $\lambda_3$ | $\epsilon$ |
|------|-------------|-------------------|-----------|-------------|-------------|-------------|-------------|-------------|------------|
|------|-------------|-------------------|-----------|-------------|-------------|-------------|-------------|-------------|------------|

|              |          |           |       |       |       |        |        |       |      |
|--------------|----------|-----------|-------|-------|-------|--------|--------|-------|------|
| FE(1)-O(1)   | 0.639(3) | 11.704(7) | 1.947 | 0.984 | 0.962 | -4.37  | -4.06  | 20.14 | 0.08 |
| FE(1)-O(11)  | 0.519(2) | 10.132(3) | 2.033 | 1.016 | 1.016 | -3.27  | -2.88  | 16.28 | 0.14 |
| FE(1)-O(21)  | 0.533(3) | 10.448(3) | 2.013 | 1.007 | 1.007 | -3.37  | -2.93  | 16.75 | 0.15 |
| FE(1)-O(1A)  | 0.587(2) | 10.867(3) | 2.001 | 1.007 | 0.995 | -3.87  | -3.56  | 18.29 | 0.09 |
| FE(2)-O(1)   | 0.697(2) | 13.506(7) | 1.916 | 0.971 | 0.945 | -4.57  | -4.47  | 22.55 | 0.02 |
| FE(2)-O(12)  | 0.486(2) | 9.860(5)  | 2.038 | 1.011 | 1.027 | -2.84  | -2.63  | 15.33 | 0.08 |
| FE(2)-O(22)  | 0.495(2) | 10.025(5) | 2.032 | 1.012 | 1.019 | -2.99  | -2.61  | 15.63 | 0.15 |
| FE(2)-O(31)  | 0.499(2) | 10.239(5) | 2.021 | 1.008 | 1.013 | -3.02  | -2.66  | 15.92 | 0.14 |
| FE(2)-O(41)  | 0.489(2) | 10.314(5) | 2.030 | 1.004 | 1.026 | -2.84  | -2.53  | 15.69 | 0.12 |
| FE(2)-O(2A)  | 0.525(2) | 9.828(5)  | 2.035 | 1.013 | 1.022 | -3.20  | -3.05  | 16.08 | 0.05 |
| O(11)-C(11)  | 2.71(2)  | -26.1(1)  | 1.252 | 0.816 | 0.436 | -24.89 | -23.73 | 22.48 | 0.05 |
| O(12)-C(11)  | 2.71(2)  | -28.1(1)  | 1.254 | 0.814 | 0.441 | -24.50 | -23.66 | 20.02 | 0.04 |
| O(21)-C(21)  | 2.69(2)  | -24.1(1)  | 1.251 | 0.821 | 0.430 | -24.94 | -24.14 | 24.93 | 0.03 |
| O(22)-C(21)  | 2.71(2)  | -29.2(1)  | 1.258 | 0.815 | 0.443 | -25.06 | -23.43 | 19.26 | 0.07 |
| O(31)-C(31)  | 2.729(6) | -29.40(5) | 1.257 | 0.816 | 0.441 | -25.15 | -23.72 | 19.46 | 0.06 |
| O(41)-C(41)  | 2.713(6) | -27.56(5) | 1.251 | 0.814 | 0.437 | -25.60 | -23.69 | 21.73 | 0.08 |
| O(1A)-C(1A)  | 2.57(1)  | -29.48(6) | 1.287 | 0.807 | 0.480 | -22.54 | -20.31 | 13.37 | 0.11 |
| O(1B)-C(1A)  | 2.91(1)  | -30.48(8) | 1.230 | 0.794 | 0.436 | -27.48 | -24.19 | 21.18 | 0.14 |
| O(2A)-C(2A)  | 2.74(2)  | -31.2(1)  | 1.262 | 0.815 | 0.447 | -24.84 | -23.65 | 17.30 | 0.05 |
| O(2B)-C(2A)  | 2.80(2)  | -29.0(1)  | 1.245 | 0.809 | 0.436 | -26.04 | -24.38 | 21.41 | 0.07 |
| O(99)-H(99A) | 2.51(2)  | -32.2(1)  | 0.969 | 0.734 | 0.235 | -36.40 | -35.83 | 39.99 | 0.02 |
| O(99)-H(99B) | 2.328(7) | -23.65(2) | 0.969 | 0.719 | 0.250 | -32.70 | -30.87 | 39.92 | 0.06 |
| N(4)-C(4A)   | 2.41(2)  | -23.98(1) | 1.350 | 0.765 | 0.585 | -20.52 | -17.93 | 14.46 | 0.14 |
| N(4)-C(4E)   | 2.39(2)  | -25.66(8) | 1.345 | 0.788 | 0.557 | -20.33 | -17.63 | 12.30 | 0.15 |
| N(4)-H(4)    | 1.94(5)  | -29.6(4)  | 1.036 | 0.807 | 0.230 | -29.77 | -27.42 | 27.57 | 0.09 |
| C(11)-H(11)  | 1.80(1)  | -18.34(5) | 1.083 | 0.755 | 0.328 | -18.53 | -17.32 | 17.51 | 0.07 |
| C(21)-H(21)  | 1.80(1)  | -18.54(2) | 1.083 | 0.756 | 0.327 | -18.72 | -17.32 | 17.51 | 0.08 |
| C(31)-H(31)  | 1.86(1)  | -19.92(5) | 1.083 | 0.768 | 0.315 | -19.67 | -18.40 | 18.14 | 0.07 |
| C(41)-H(41)  | 1.76(1)  | -18.13(2) | 1.083 | 0.754 | 0.330 | -18.28 | -16.94 | 17.09 | 0.08 |
| C(1A)-H(1A)  | 1.70(1)  | -16.18(2) | 1.083 | 0.747 | 0.336 | -17.18 | -15.90 | 16.90 | 0.08 |
| C(2A)-H(2A)  | 1.79(1)  | -17.90(2) | 1.083 | 0.755 | 0.329 | -18.55 | -16.92 | 17.57 | 0.10 |
| C(4A)-C(4B)  | 2.26(2)  | -21.66(5) | 1.376 | 0.729 | 0.647 | -17.78 | -14.53 | 10.66 | 0.22 |
| C(4A)-H(4A)  | 1.80(1)  | -18.12(2) | 1.083 | 0.765 | 0.318 | -19.08 | -17.74 | 18.70 | 0.08 |
| C(4B)-C(4C)  | 2.24(2)  | -22.05(5) | 1.394 | 0.742 | 0.651 | -18.23 | -14.74 | 10.91 | 0.24 |
| C(4B)-H(4B)  | 1.75(1)  | -16.75(3) | 1.083 | 0.759 | 0.324 | -18.09 | -17.09 | 18.43 | 0.06 |
| C(4C)-C(4D)  | 2.27(2)  | -22.78(8) | 1.388 | 0.802 | 0.586 | -17.46 | -14.56 | 9.24  | 0.20 |
| C(4C)-H(4C)  | 1.74(1)  | -17.21(3) | 1.083 | 0.753 | 0.330 | -17.98 | -16.81 | 17.59 | 0.07 |
| C(4D)-C(4E)  | 2.23(2)  | -20.03(4) | 1.393 | 0.699 | 0.693 | -17.43 | -14.22 | 11.61 | 0.23 |
| C(4D)-H(4D)  | 1.78(1)  | -16.96(3) | 1.083 | 0.764 | 0.319 | -18.00 | -17.80 | 18.83 | 0.01 |
| C(4E)-C(4F)  | 1.76(2)  | -12.71(6) | 1.491 | 0.857 | 0.634 | -11.72 | -11.20 | 10.21 | 0.05 |
| C(4F)-H(4FA) | 1.75(2)  | -14.01(7) | 1.061 | 0.722 | 0.339 | -16.77 | -15.63 | 18.39 | 0.07 |
| C(4F)-H(4FB) | 1.70(2)  | -13.66(4) | 1.061 | 0.712 | 0.349 | -16.25 | -14.76 | 17.35 | 0.10 |
| C(4F)-H(4FC) | 1.73(2)  | -14.23(3) | 1.061 | 0.716 | 0.345 | -16.80 | -15.11 | 17.68 | 0.11 |

## XDFFT output

**Table S2A. Synchrotron model**

|    |        |                      |        |        |        |       |
|----|--------|----------------------|--------|--------|--------|-------|
|    | PK(1)  | is 0.07 A from Fe(2) | 0.2809 | 0.3340 | 0.8507 | 0.71  |
|    | PK(2)  | is 1.00 A from Fe(1) | 0.0193 | 0.2500 | 1.0299 | 0.65  |
|    | PK(3)  | is 0.39 A from O(22) | 0.4624 | 0.3876 | 1.0187 | 0.62  |
| 44 | PK(4)  | .....                | 0.3019 | 0.2404 | 0.1645 | 0.60  |
|    | PK(5)  | is 0.97 A from Fe(1) | 0.1873 | 0.2500 | 1.0158 | 0.60  |
| 45 | PK(6)  | .....                | 0.4722 | 0.2500 | 0.7172 | 0.60  |
| 46 | PK(7)  | .....                | 0.1408 | 0.0188 | 0.4536 | 0.53  |
|    | PK(8)  | is 1.26 A from Fe(2) | 0.2519 | 0.3049 | 0.7527 | 0.53  |
|    | PK(9)  | is 0.47 A from Fe(1) | 0.1895 | 0.2500 | 1.1150 | 0.52  |
|    | PK(10) | is 0.64 A from C(41) | 0.6177 | 0.2500 | 0.8485 | 0.52  |
| 47 | HL(1)  | .....                | 0.3012 | 0.2500 | 0.1986 | -0.97 |
|    | HL(2)  | is 0.69 A from Fe(2) | 0.2542 | 0.3001 | 0.8523 | -0.62 |
| 48 | HL(3)  | .....                | 0.2744 | 0.2500 | 0.7632 | -0.61 |
| 49 | HL(4)  | .....                | 0.4432 | 0.2500 | 0.6177 | -0.56 |
|    | HL(5)  | is 0.70 A from Fe(2) | 0.3362 | 0.3609 | 0.8350 | -0.55 |
| 50 | HL(6)  | .....                | 0.6939 | 0.2500 | 0.3691 | -0.54 |
|    | HL(7)  | is 0.84 A from Fe(1) | 0.2526 | 0.2500 | 1.0976 | -0.53 |
| 51 | HL(8)  | .....                | 0.1958 | 0.2500 | 0.3648 | -0.52 |
| 52 | HL(9)  | .....                | 0.3933 | 0.2500 | 0.2565 | -0.51 |
| 53 | HL(10) | .....                | 0.8306 | 0.2500 | 0.5306 | -0.50 |

**Table S2B. Conventional model**

|    |        |                      |         |        |        |       |
|----|--------|----------------------|---------|--------|--------|-------|
| 44 | PK(1)  | .....                | 0.4451  | 0.2500 | 0.6142 | 0.61  |
| 45 | PK(2)  | .....                | 0.1338  | 0.0860 | 0.0937 | 0.39  |
|    | PK(3)  | IS 0.40 A FROM O(11) | -0.0841 | 0.3044 | 1.0317 | 0.31  |
|    | PK(4)  | IS 0.45 A FROM O(21) | 0.2780  | 0.3287 | 1.1369 | 0.27  |
|    | PK(5)  | IS 0.19 A FROM O(1B) | -0.1982 | 0.2500 | 1.4177 | 0.26  |
| 46 | PK(6)  | .....                | 0.6684  | 0.2500 | 0.3204 | 0.25  |
|    | PK(7)  | IS 0.41 A FROM H(41) | 0.8138  | 0.2500 | 0.8016 | 0.25  |
| 47 | PK(8)  | .....                | 0.7451  | 0.2056 | 0.4500 | 0.22  |
| 48 | PK(9)  | .....                | 0.4473  | 0.0840 | 0.6128 | 0.21  |
|    | PK(10) | IS 0.76 A FROM Fe(1) | 0.0215  | 0.2500 | 1.1118 | 0.21  |
|    | HL(1)  | IS 0.54 A FROM O(21) | 0.3825  | 0.3015 | 1.1780 | -0.33 |
|    | HL(2)  | IS 0.32 A FROM O(1)  | 0.1922  | 0.2500 | 0.9159 | -0.29 |
| 49 | HL(3)  | .....                | 0.0818  | 0.0819 | 0.0692 | -0.28 |
| 50 | HL(4)  | .....                | 0.2152  | 0.2500 | 0.4022 | -0.26 |
|    | HL(5)  | IS 0.74 A FROM Fe(2) | 0.3041  | 0.3252 | 0.9187 | -0.26 |
| 51 | HL(6)  | .....                | 0.3212  | 0.2500 | 0.2316 | -0.25 |
|    | HL(7)  | IS 0.55 A FROM O(11) | -0.1431 | 0.3047 | 1.0370 | -0.25 |
|    | HL(8)  | IS 0.72 A FROM Fe(1) | 0.1102  | 0.2500 | 1.0294 | -0.25 |
|    | HL(9)  | IS 0.76 A FROM Fe(1) | 0.2408  | 0.2500 | 1.1000 | -0.23 |
| 52 | HL(10) | .....                | 0.4466  | 0.2317 | 0.5963 | -0.22 |

## Atomic charges

**Table S3A.** Atomic charges, synchrotron model.

| Atom  | q( $\Omega$ ) | V001   | Atom   | q( $\Omega$ ) | V001  |
|-------|---------------|--------|--------|---------------|-------|
| Fe(1) | 1.734         | 54.13  | C(4B)  | -0.091        | 79.81 |
| Fe(2) | 1.745         | 54.79  | C(4C)  | -0.058        | 76.04 |
| O(1)  | -0.777        | 86.03  | C(4D)  | -0.143        | 79.30 |
| O(11) | -1.058        | 105.03 | C(4E)  | 0.328         | 55.77 |
| O(12) | -1.115        | 101.24 | C(4F)  | -0.214        | 78.22 |
| O(21) | -1.045        | 100.50 | H(11)  | 0.194         | 34.48 |
| O(22) | -1.047        | 98.36  | H(21)  | 0.190         | 35.92 |
| O(31) | -1.089        | 102.55 | H(31)  | 0.103         | 39.84 |
| O(41) | -0.994        | 102.62 | H(41)  | 0.095         | 44.84 |
| O(1A) | -1.014        | 91.03  | H(1A)  | 0.104         | 41.01 |
| O(1B) | -0.921        | 113.73 | H(2A)  | 0.191         | 35.41 |
| O(2A) | -1.018        | 96.09  | H(4)   | 0.420         | 17.73 |
| O(2B) | -1.064        | 108.46 | H(4A)  | 0.177         | 35.60 |
| O(99) | -1.141        | 145.29 | H(4B)  | 0.184         | 37.15 |
| N(4)  | -0.942        | 82.30  | H(4C)  | 0.175         | 38.67 |
| C(11) | 1.204         | 46.15  | H(4D)  | 0.180         | 37.27 |
| C(21) | 1.311         | 48.04  | H(4FA) | 0.217         | 35.35 |
| C(31) | 1.221         | 43.92  | H(4FB) | 0.206         | 37.41 |
| C(41) | 1.434         | 46.17  | H(4FC) | 0.198         | 36.82 |
| C(1A) | 1.225         | 47.62  | H(99A) | 0.551         | 14.51 |
| C(2A) | 1.289         | 47.47  | H(99B) | 0.570         | 13.59 |
| C(4A) | 0.082         | 71.71  |        |               |       |

**Table S3B.** Atomic charges, conventional model.

| Atom  | q( $\Omega$ ) | V <sub>001</sub> | Atom  | q( $\Omega$ ) | V <sub>001</sub> |
|-------|---------------|------------------|-------|---------------|------------------|
| Fe(1) | +1.767        | 54.79            | C(4B) | -0.232        | 86.48            |
| Fe(2) | +1.773        | 55.63            | C(4C) | -0.221        | 81.49            |
| O(1)  | -0.672        | 85.09            | C(4D) | -0.139        | 83.58            |
| O(11) | -1.239        | 108.08           | C(4E) | +0.251        | 56.30            |
| O(12) | -1.190        | 103.60           | C(4F) | -0.271        | 84.72            |
| O(21) | -1.177        | 102.55           | H(11) | +0.235        | 37.88            |
| O(22) | -1.189        | 102.39           | H(21) | +0.232        | 37.46            |
| O(31) | -1.220        | 105.14           | H(31) | +0.238        | 38.91            |
| O(41) | -1.184        | 106.06           | H(41) | +0.231        | 45.64            |
| O(1A) | -1.088        | 92.54            | H(1A) | +0.252        | 40.96            |
| O(1B) | -1.216        | 118.76           | H(2A) | +0.241        | 39.03            |
| O(2A) | -1.185        | 98.01            | H(4)  | +0.591        | 11.70            |

---

|       |        |        |        |        |       |
|-------|--------|--------|--------|--------|-------|
| O(2B) | -1.236 | 113.71 | H(4A)  | +0.280 | 33.07 |
| O(99) | -1.330 | 148.23 | H(4B)  | +0.284 | 35.21 |
| N(4)  | -1.029 | 84.95  | H(4C)  | +0.263 | 41.13 |
| C(11) | +1.500 | 45.48  | H(4D)  | +0.291 | 35.30 |
| C(21) | +1.520 | 47.40  | H(4FA) | +0.265 | 35.50 |
| C(31) | +1.445 | 43.96  | H(4FB) | +0.241 | 37.35 |
| C(41) | +1.560 | 48.16  | H(4FC) | +0.242 | 36.04 |
| C(1A) | +1.353 | 49.78  | H(99A) | +0.540 | 14.47 |
| C(2A) | +1.419 | 49.68  | H(99B) | +0.548 | 15.53 |
| C(4A) | +0.074 | 74.93  |        |        |       |

---

## Static deformation maps

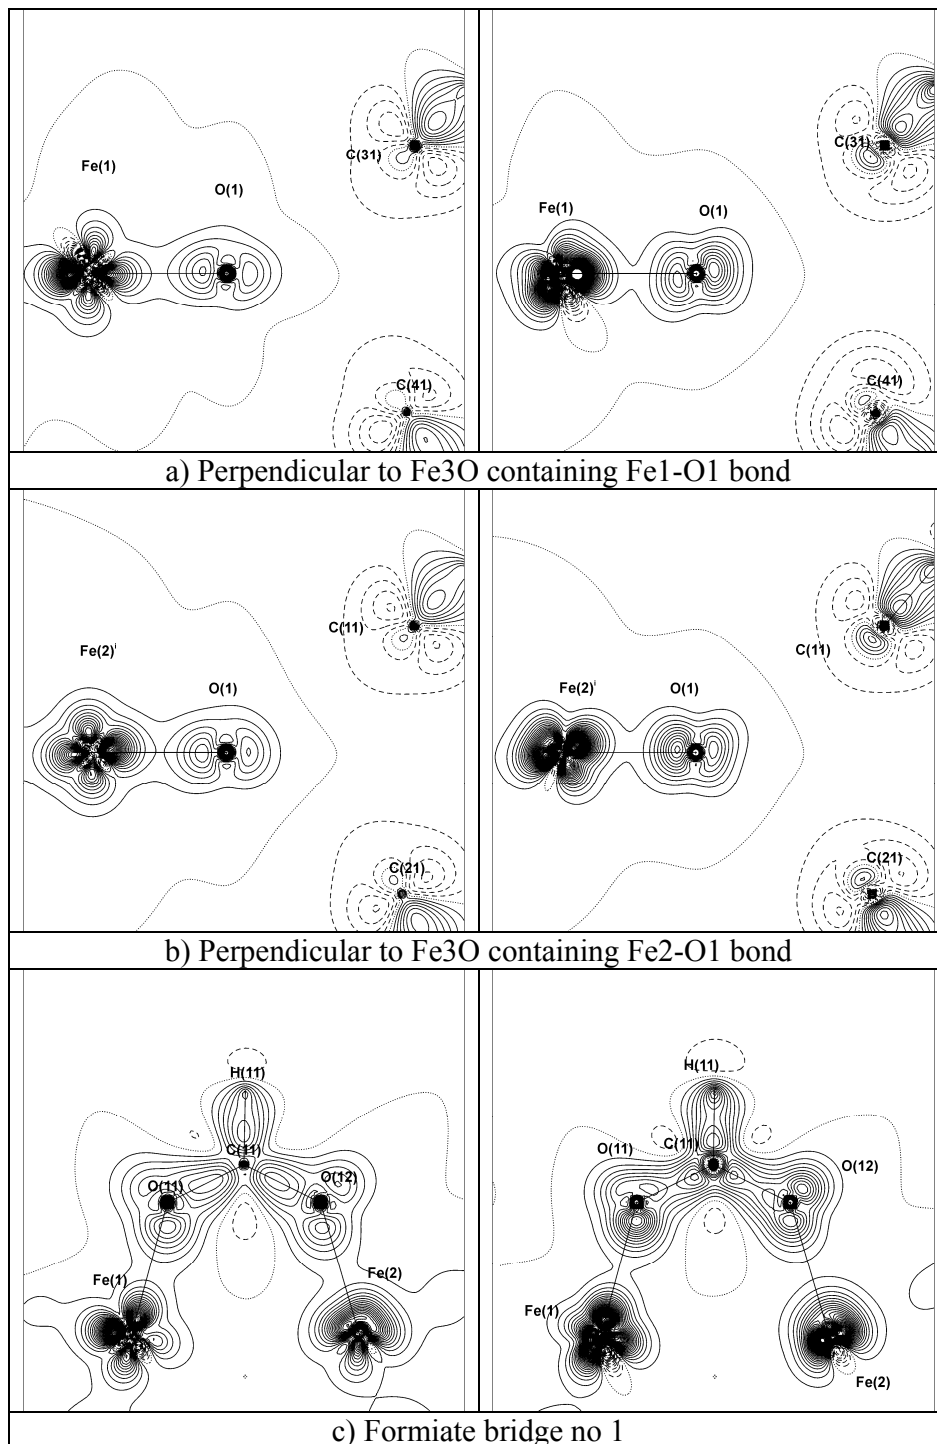

**Figure S2.** Static deformation density maps in selected planes for conventional model (left) and synchrotron model (right). The contours are as in Figure 2a.



## Charge concentrations near O and Fe

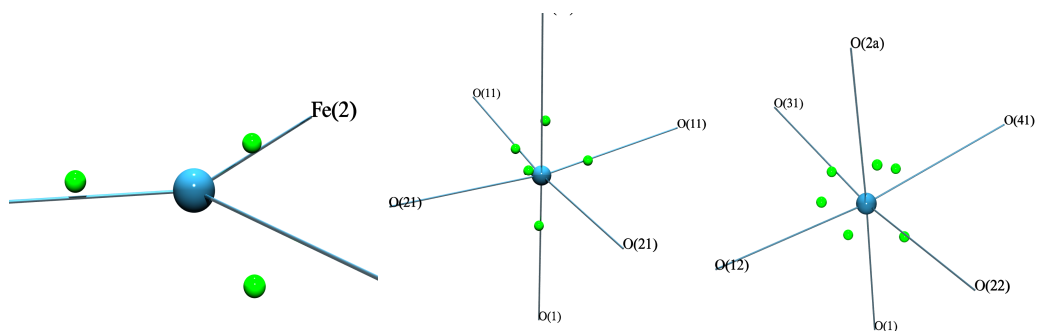

**Figure S3A.** Distribution of critical points in the Laplacian distribution for O(1), Fe(1) and Fe(2), synchrotron model. Only the (3,-3) critical points in the Laplacian distribution are shown.

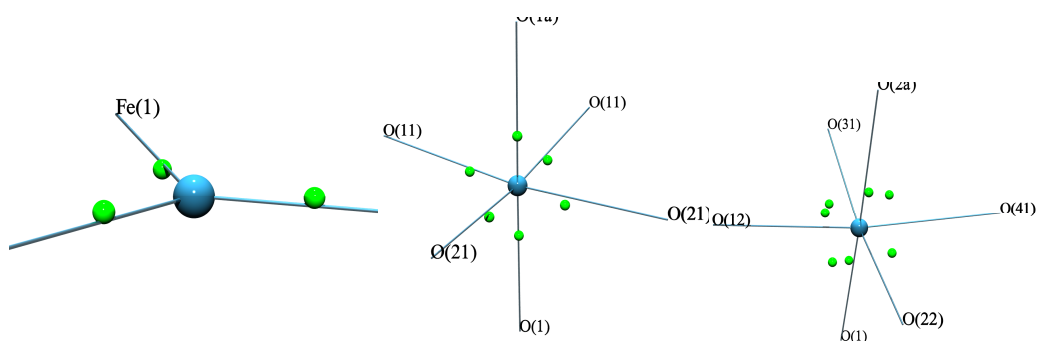

**Figure S3B.** Distribution of critical points in the Laplacian distribution for O(1), Fe(1) and Fe(2), conventional model.

## Plots of energy density vs bond length

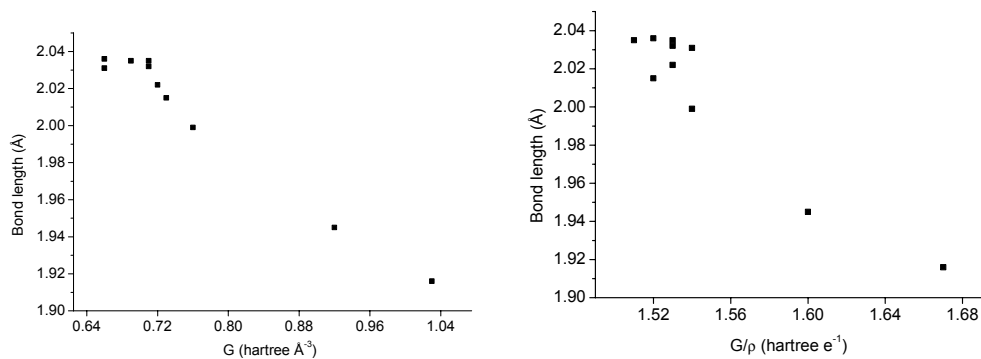

**Figure S4A.** Synchrotron model, (left) d(Fe-O) vs G and (right) d(Fe-O) vs (G/ρ).

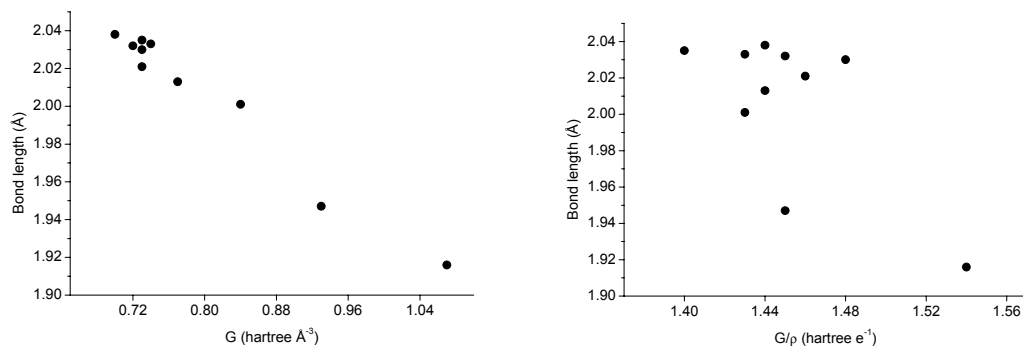

**Figure S4B.** Conventional model, (left) d(Fe-O) vs G and (right) d(Fe-O) vs (G/ρ).

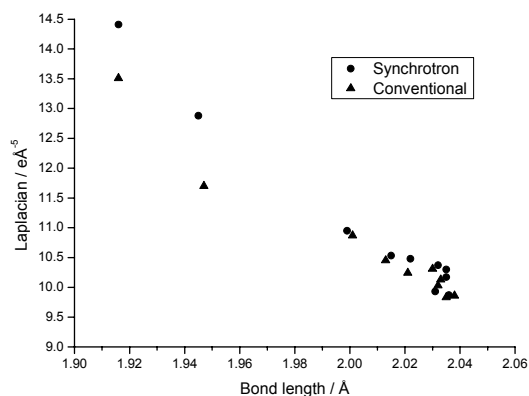

**Figure S4C.** Laplacian values in the Fe-ligand bcp's for both models.

## Ratio of F(obs) vs F(calc) in shells of reciprocal space

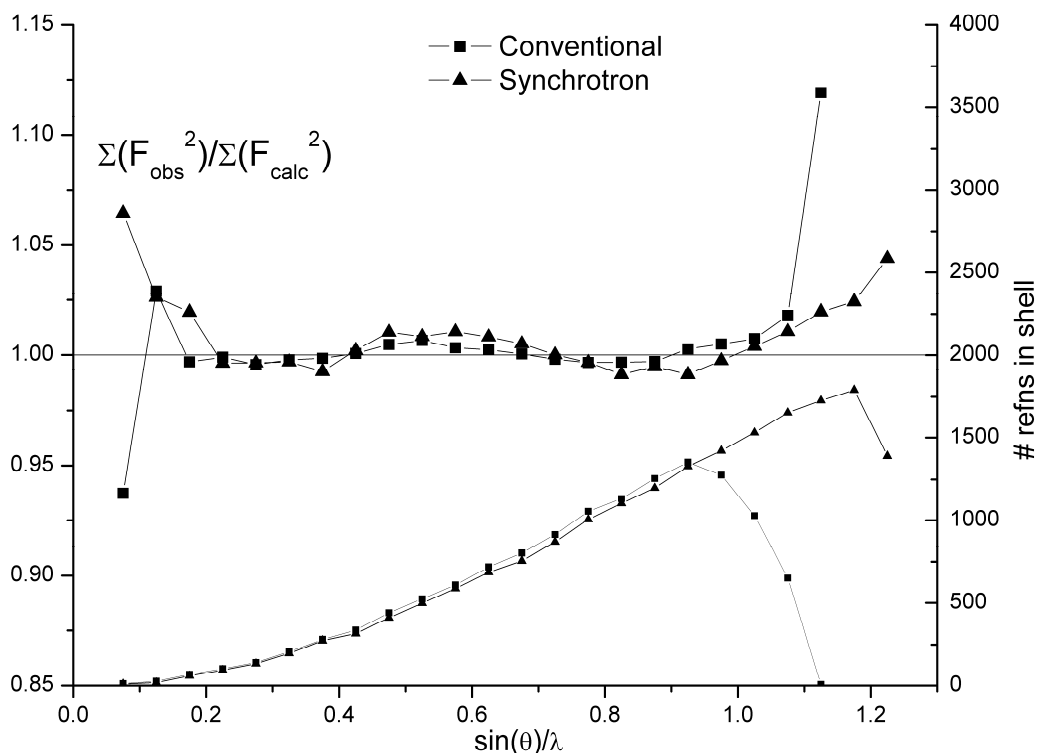

**Figure S5.** Ratio of the sum of  $F^2(\text{obs})$  over the sum of  $F^2(\text{calc})$  in shells of reciprocal space. The lower curves show the number of reflections in each shell which is read on the right Y-axis.

It is clear that the ratio stays close to 1 in most of the range. In the LO regime a couple of reflections perturb the curves in different directions for both data sets. In the HO range, the conventional data curve creeps slightly up but the statistics is based on only a small number of reflections and the average values are furthermore small. The number of reflections in the synchrotron data shells at high angle is larger than for the conventional data, and so there is a small but significant increase in this curve with a maximum of around 4-5% for the outermost shell. The synchrotron data was for this calculation truncated to reflections less than  $1.25 \text{ \AA}^{-1}$  in  $\sin(\theta)/\lambda$ . Above this value, the number of reflections decrease quickly while the ratio increases.

## **d-orbital populations – synchrotron model**

**Table S4** d-orbital populations from synchrotron model.

| Atom <sup>a</sup> | d(z <sup>2</sup> ) | d(xy) | d(x <sup>2</sup> -y <sup>2</sup> ) | d(yz) | d(xz) | SUM  |
|-------------------|--------------------|-------|------------------------------------|-------|-------|------|
| Fe(1)             | 1.41               | 1.39  | 1.00                               | 1.14  | 1.14  | 6.08 |
| Fe(2)             | 1.31               | 1.06  | 1.30                               | 1.18  | 1.23  | 6.06 |

### Isosurface Laplacian maps

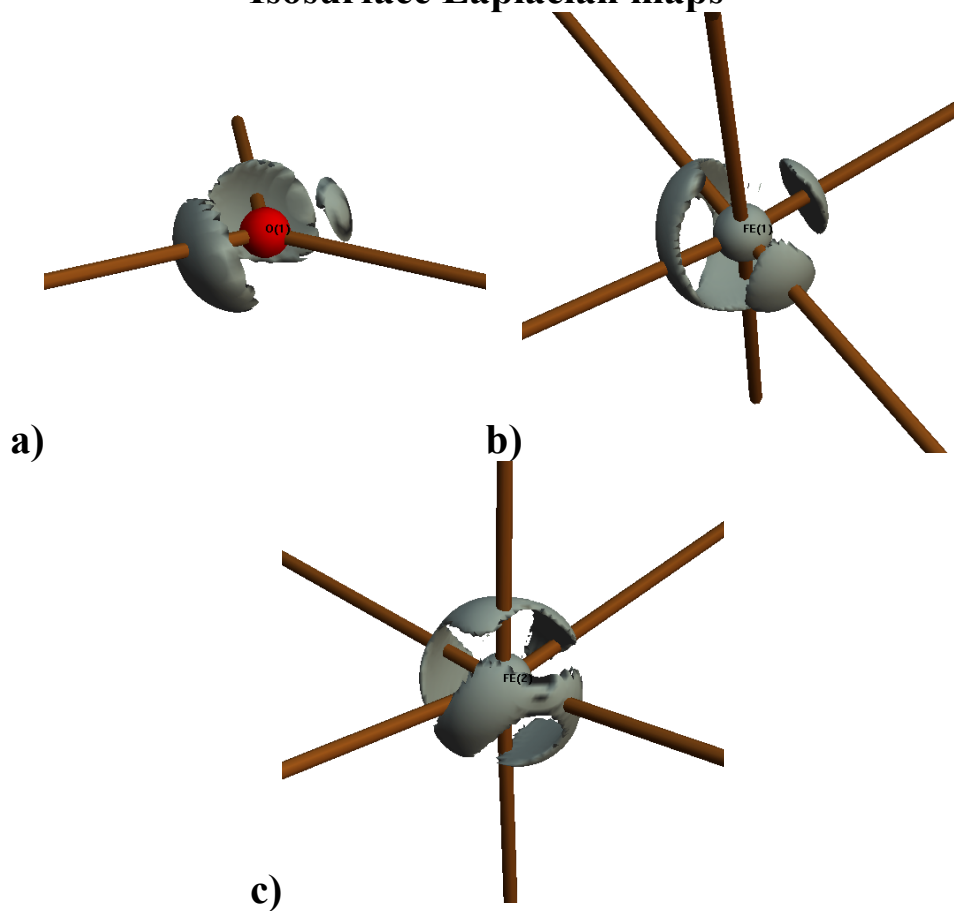

**Figure S6.** Isosurface Laplacian maps of (a) the central O(1), (b) Fe(1) and (c) Fe(2) from the synchrotron model. The surfaces were drawn at a contour of  $L(r) = -110 \text{ e}\text{\AA}^{-5}$  for (a) and  $L(r) = -750 \text{ e}\text{\AA}^{-5}$  for (b) and (c).
